# Supplementary material for: Stem Cell Recruitment of Bionic Hydrogels Enhances Vascularized Bone Regeneration through Macrophage Reprogramming
Source: Research Square preprint supplement (doi:10.21203/rs.3.rs-5958725/v1), 2025-02-10
Supplement: Supplementary file 1 [file 124dcf827b1590430d26a6c5.docx]

**Supplementary experimental section**

**1. [Materials and methods](https://www.sciencedirect.com/science/article/pii/S2452199X23001706?via=ihub" \l "sec2" \o "2. Materials and methods)**

**1.1 Materials**

Gelatin was purchased from Sigma-Aldrich (Shanghai, China). Methacrylate (MA) was purchased from Andromax (Shanghai, China). QK peptide (KLTWQELYQLKYKGI, 99% pure) was purchased from Shanghai Qiangyao Biotechnology Co. TCP was purchased from Jiangsu Xianfeng Nanomaterials Science Co. DA, aminomethane (Tris), and lipopolysaccharide (LPS) were purchased from Sigma-Aldrich Trading Co, Ltd. (Shanghai, China). Fetal bovine serum (FBS), Dulbecco's modified Eagle's medium (DMEM), and alpha-modified Eagle's medium (α-MEM) were used. Purchased from Gibco Life Technologies Co. (Grand Island, USA). Endothelial cell Medium was purchased from ScienCell Research Laboratories (Shanghai, China). The Cell Counting Kit-8 (CCK-8) and Live/Dead Staining Kit were purchased from Dojindo Laboratories (Kumamoto, Japan).

**1.2 Preparation of the TPQ nanocomposites**

TCP nanoparticles were initially dispersed in a dopamine solution at a concentration of 2 mg/mL. This mixture was subjected to ultrasonication for 30 min to ensure uniform dispersion. The suspension was subsequently stirred at 60 °C for 12 h to facilitate the DA, resulting in the formation of a PDA coating on the TCP nanoparticles. The TCP@PDA nanoparticles were then isolated through a drying process and redispersed in deionized water at a concentration of 1 mg/ml. To this dispersion, a solution of the QK peptide at a concentration of 1 mg/mL was added dropwise, and the mixture was stirred at room temperature (25 °C) for an additional 12 h to allow peptide adsorption onto the PDA-coated nanoparticles. The final solution was subjected to lyophilization to yield the TPQ nanocomposite.

**1.3 Porous GelMA hydrogel preparation**

Synthesis of GelMA hydrogels: Gelatin was dissolved in PBS to achieve a homogeneous solution. MA was then added dropwise to the gelatin solution at a controlled rate of 0.5 mL/min, and the reaction was conducted in an oil bath at 37°C for 3 h to allow for efficient methacrylation. The reaction was quenched by the addition of excess PBS. Unreacted MA was removed through centrifugation at 5000 rpm for 15 min, followed by dialysis against PBS at 38°C for 48 h to ensure the complete removal of any residual reactants. The resulting GelMA hydrogel was then freeze-dried under vacuum conditions to obtain a dry, stable product.

Synthesis of Porous GelMA hydrogels: The synthesis of the porous GelMA hydrogel commenced with the preparation of an aqueous solution by mixing the previously synthesized GelMA hydrogel with a photoinitiator. This solution was subsequently combined with an aqueous poly (ethylene oxide) (PEO) solution to create a two-phase emulsion. UV irradiation for 5 min induced photocrosslinking of the GelMA phase, resulting in a hydrogel with a temporary porous structure. The PEO-containing hydrogel was then subjected to dialysis in cell culture medium for 24 h to remove the PEO phase. This process yielded a porous GelMA hydrogel with an interconnected pore structure, which is crucial for cell infiltration and nutrient exchange.

**1.4 Evaluation of *in vitro* cytocompatibility**

To evaluate the biocompatibility of hydrogels with MC-3T3-E1 cells and HUVECs, we established a Transwell coculture system. The hydrogels were positioned in the upper compartment, while the cells were seeded in the lower compartment. Following coincubation periods of 1, 3, and 5 days, an aliquot of CCK-8 reagent was added to each well, and the plates were incubated for an additional hour at 37°C. The OD at 450 nm was subsequently measured via a spectrophotometric plate reader to assess cell viability.

On the third day of incubation, cell viability and morphology were assessed via a live/dead cell staining kit, and the stained cells were examined under a fluorescence microscope. Furthermore, to observe the morphological structure of the cells, cytoskeletal staining was performed. The spreading area of the cells across different sample groups was quantified *via* the ImageJ software (NationalInstitutesofHealth, Bethesda, USA).

**1.5 *In vitro* immunomodulatory evaluation**

Macrophage stimulation and coculture with hydrogels: RAW264.7 macrophages, prestimulated with 10 ng/mL LPS were seeded in the lower compartment of Transwell chambers. The hydrogels were placed in the upper compartment and the system was incubated for 3 days to assess changes in cellular morphology and structure. Observations were made *via* the confocal microscopy (Carl Zeiss GmbH, Oberkochen, Germany).

Flow cytometry analysis: Cells were surface-labeled with a CD86 antibody (Elabscience, E-AB-F0994E) and a CD206 antibody (Elabscience, F-AB-F1135C). After labeling, the cells were analyzed *via* flow cytometry (FC500; Beckman Coulter, Fullerton, CA, USA). Data acquisition was followed by analysis with FlowJo software to quantify the expression levels of the respective markers.

Immunofluorescence Staining and Quantitative Analysis: After 3 days of coincubation, immunofluorescence staining was performed to visualize the expression of CD86 and CD206. The stained cells were examined under a confocal microscope, and the obtained images were subjected to quantitative analysis *via* the ImageJ software.

**1.6 *In vitro* evaluation of angiogenic activity**

Wound Healing Assay: HUVECs were seeded in six-well plates and allowed to form a confluent monolayer. A linear scratch was introduced into the HUVECs monolayer via a 1 mL pipette tip, and the resulting cell debris was gently removed by washing with PBS. Following a 24 h incubation period, the degree of wound closure in the different groups was documented via light microscopy, and the healing rate was quantified *via* the ImageJ software.

Transwell Migration Assay: HUVECs were seeded into the upper chamber of 24-well Transwell plates. After 24 h, the cells that had migrated to the lower chamber were fixed and stained with 0.1% crystal violet. The stained cells were visualized under an inverted microscope, and the migration was quantified via ImageJ software.

*In Vitro* angiogenesis assay: To assess the *in vitro* angiogenic potential of HUVECs, 24-well plates were coated with Matrigel and incubated at 37°C for 30 min to ensure gel polymerization. HUVECs were then seeded onto Matrigel-coated wells and incubated at 37°C for 7 h. The formation of vascular networks was observed under a light microscope.

Immunofluorescence Staining: After 3 days of coincubation, immunofluorescence staining was performed to evaluate the expression of CD31 and VEGF. The stained samples were examined under a confocal microscope, and the fluorescence intensity was quantified via ImageJ software.

Gene expression analysis: The expression of angiogenesis-related genes (FLT1, KDR, and VEGF) was assessed via RT-qPCR after 7 days of coincubation. The sequences of primer used for amplification are detailed in Table 1.

**1.7 *In vitro* evaluation of osteogenic differentiation**

Wound Healing Assay: MC-3T3-E1 cells were seeded in 6-well Transwell plates and cultured until they formed a confluent monolayer. A linear scratch was introduced into the monolayer via 1 mL pipette tip, and the hydrogel was placed in the upper layer while serum-free medium was added to the lower chamber. After a 24 h incubation period, the degree of wound closure of MC-3T3-E1 cells was documented via an inverted microscope, and the healing rate was quantified via ImageJ software.

Transwell Migration Assay: MC-3T3-E1 cells were seeded into the upper chambers of 24-well Transwell plates. After 24 h, the cells that had migrated to the lower chamber were fixed and stained with 0.1% crystal violet. The stained cells were visualized via an inverted microscope and counted via ImageJ software.

Osteogenic Differentiation Assay: MC-3T3-E1 cells were seeded in 12-well Transwell plates with hydrogels placed in the upper layer. The osteogenic induction medium, which was changed every three days and contained 0.1 μM dexamethasone, 10 mM β-glycerophosphate, and 50 μg/mL L-ascorbic acid, was used. On day 7, the cells were stained with an alkaline phosphatase chromogenic kit (Beyotime, C3206, China), and images were captured with an inverted microscope. ALP activity was measured via a BCA protein assay kit in conjunction with an alkaline phosphatase assay kit. Mineralization of the extracellular matrix was assessed on day 14 via ARS staining. After image acquisition with an inverted microscope, 10% cetylpyridinium chloride (Sigma-Aldrich) was added, the samples were shaken well, and the absorbance of the supernatant at 562 nm was measured via a spectrophotometric plate reader.

Protein expression analysis: After 7 days of incubation, MC-3T3-E1 cells were lysed in RIPA lysis buffer supplemented with protease and phosphatase inhibitors. Insoluble debris was removed by centrifugation at 12,000 rpm for 10 min at 4°C, and the supernatant was collected for protein concentration determination via a BCA kit. The extracted proteins were subjected to Western blot analysis to assess protein expression across different groups.

Gene expression analysis: The expression of osteogenesis-related genes (RUNX-2, OPN, and BMP-2) was evaluated via RT-qPCR after 4 days of coincubation. The Primer sequences are provided in Table 1.

**1.8 Establishment and treatment of femoral defect model in rats**

Animal Model and Grouping: This study utilized 8-week-old male SD rats, with an average weight of 250 ± 15 g. The animals were randomly assigned to one of three experimental groups, each consisting of six rats: (1) Control group (no implantation), (2) TPGel group (implanted with the TPGel hydrogel), and (3) TPQGel group (implanted with the TPQGel hydrogel).

Surgical Procedure: Rats were anesthetized via the intraperitoneal injection of pentobarbital at a dosage of 35 mg/kg. The surgical site was sterilized and draped with a surgical towel. The femur of the left leg was exposed, and a critical-sized bone defect measuring 5 mm × 5 mm was created at the proximal end via an electric drill. A sterilized hydrogel scaffold was then implanted into the defect site, and the incision was closed with layered sutures. The experimental protocol was reviewed and approved by the Animal Ethics Committee of Shanghai Public Health Clinical Center (approval number 2023-A032-01).

**1.9 Gross observation and radiological evaluation**

Euthanasia and Sample Collection: Rats were humanely euthanized under deep anesthesia at 3 and 6 weeks posttreatment. To facilitate access to the femur, the initial incision site was reopened. The femurs were harvested, fixed in a 4% paraformaldehyde solution, and subjected to immediate Micro-CT scanning and 3D reconstruction for morphological assessment.

Quantitative Bone Analysis: Following the imaging procedures, the BV/TV and Tb. Th were determined via specialized software for quantitative comparison. These parameters provide insights into the structural integrity of bone and the efficacy of the treatments administered.

**1.10 Histological examination**

Tissue Harvesting and Processing: At week 3, the rats were euthanized, and their femurs were harvested. The collected femurs were immediately fixed in a 4% paraformaldehyde solution and subsequently decalcified in a 10% EDTA solution for a period of 4 weeks. Following decalcification, the tissues were dehydrated via an ethanol gradient and were then embedded in paraffin. Five-micrometer thick sections were prepared from the paraffin-embedded tissues and subjected to H&E staining as well as immunohistochemical staining for histological analysis.

Organ Biocompatibility Assessment: To assess the biocompatibility of the composite material, organs including the heart, kidney, liver, lung, and spleen were harvested from the rats 4 weeks postimplantation and processed for H&E staining analysis.

Subcutaneous Vascularization Study: To investigate the subcutaneous vascularization effects of the TPQGel hydrogel, 12 SD rats were randomly selected and equally divided into two groups. One group received subcutaneous implantation of the TPQGel hydrogel, while the other served as a control. Vascularization at the implantation sites was evaluated at 5 and 10 days postimplantation.

**1.11 Statistical analysis**

All experiments were performed with three or more replications. The results are expressed as means ± SDs. Statistical analysis was performed via SPSS software (version 21, USA). For comparisons between groups, repeated data were examined via ANOVA. Statistical significance was determined according to the following p-values: * *P*< 0.05, ** *P*<0.01; # *P*< 0.05, ## *P*< 0.01. All the graphs were prepared via GraphPad Prism (version 9.4.1, USA).

**Supplementary figures, videos and tables**

**Video 1**—Video of TPQGel Hydrogel Injection in Liquid Environments and Solid Surfaces

[785bb7b40a5d1e41900ba8d7f1de8d5b.mp4](骨修复课题/表征/可注射/785bb7b40a5d1e41900ba8d7f1de8d5b.mp4)

[c761b9000ebf9050d356e8c65d0055b9.mp4](骨修复课题/表征/可注射/c761b9000ebf9050d356e8c65d0055b9.mp4)

**Video 2**—Compression video of the GelMA, TPGel, and TPQGel hydrogels

[20241122222006.mp4](骨修复课题/表征/压缩/WeChat_20241122222006.mp4)

**Figure S1**


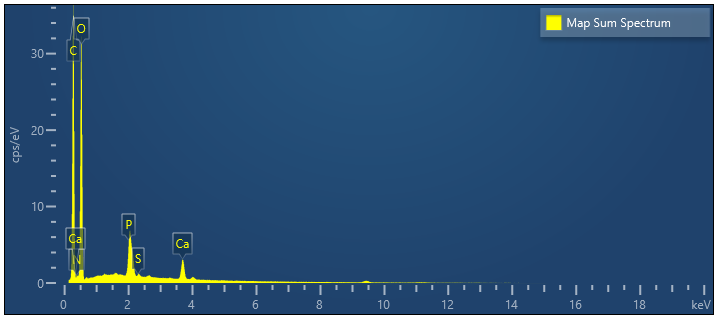


S1:Element distribution ratio of TPQ nanoparticles.

**Figure S2**


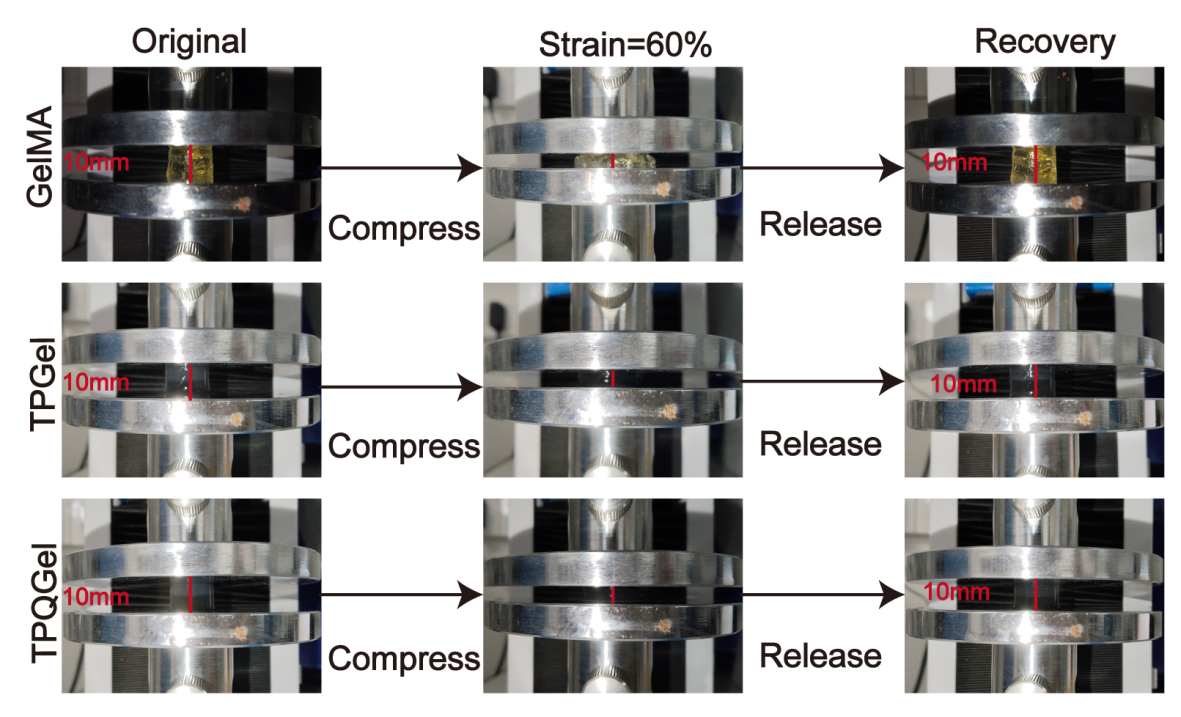


S2: Diagram of the compression process of GelMA, TPGel, and TPQGel hydrogels

**Figure S3**


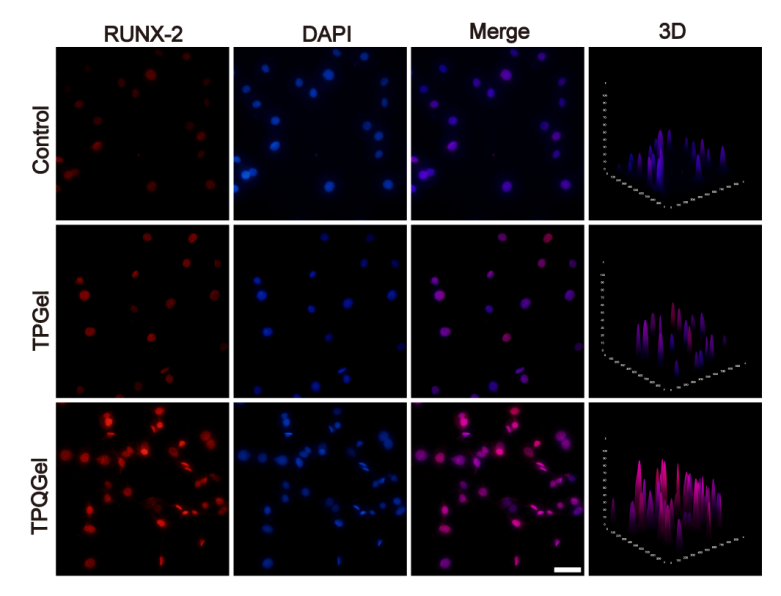


S3：Immunofluorescence staining for RUNX-2. Scale bars: 20 μm

**Figure S4**


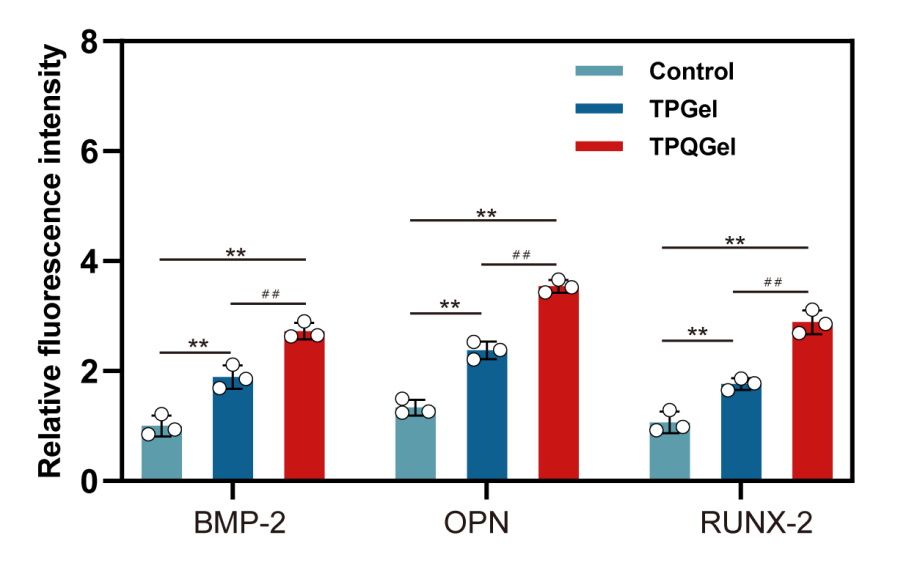


S4: Quantification of immunofluorescence staining for BMP-2, OPN, and RUNX-2 in MC-3T3-E1cells. **p* <0.05, ***p* < 0.01 indicates signiﬁcant diﬀerences compared with the control group. ##*p* < 0.01 indicates signiﬁcant diﬀerences compared with the TPGel group.

**Figure S5**


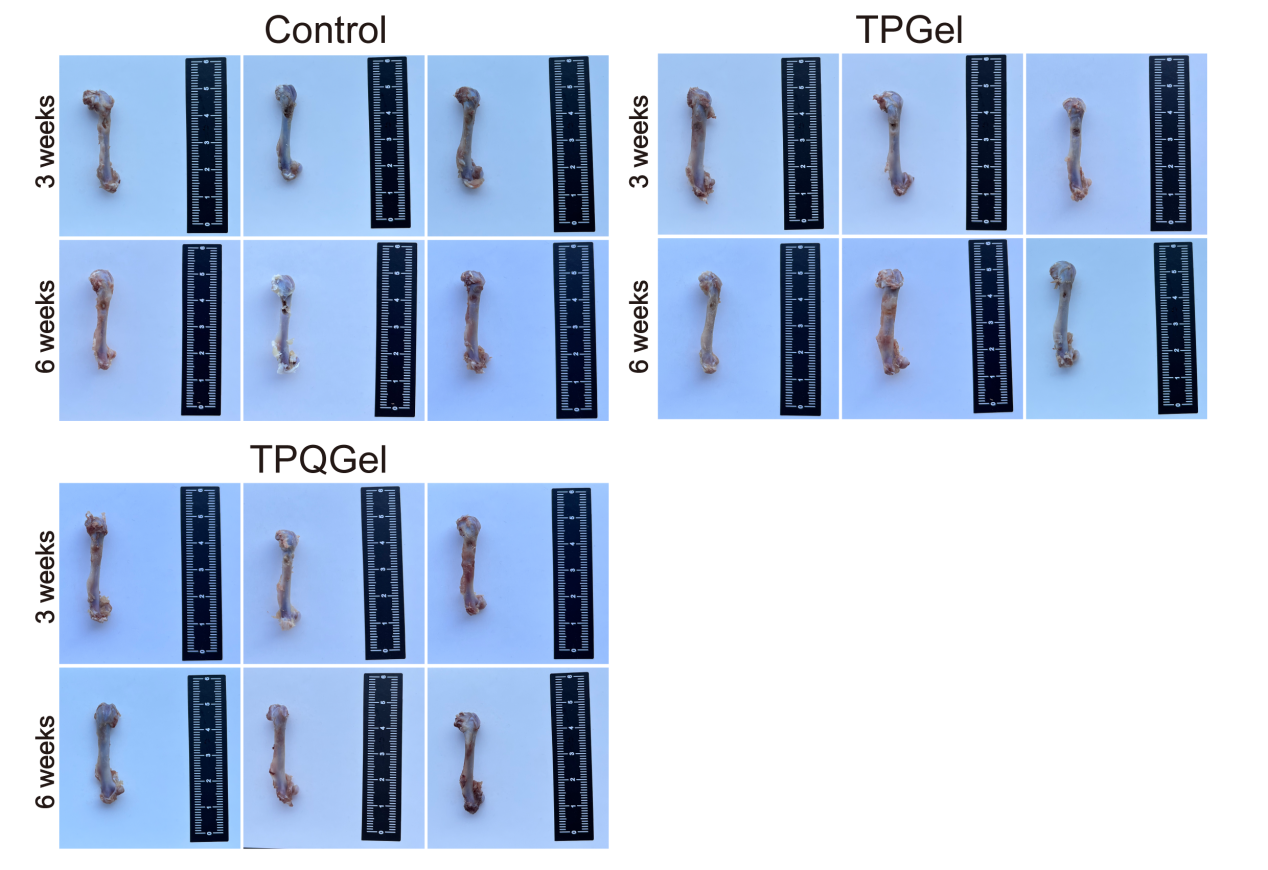


S5: Bone gross maps at 3 and 6 weeks for the control, TPGel, and TPQGel groups.

**Table 1**

Primers used in RT-qPCR.

| Gene | Forward Primer (5′-3′) | Reverse Primer (5′-3′) |
| --- | --- | --- |
| Mouse-GAPDH | TGACCACAGTCCATGCCATC | GACGGACACATTGGGGGTAG |
| Mouse-CD86 | ATATGACCGTTGTGTGTGTTCTGGA | AGGGCCACAGTAACTGAAGCTGTAA |
| Mouse-CD206 | ATGGATTGCCCTGAACAGCA | TGTACCGCACCCTCCATCTA |
| Mouse-IL-4 | ACGGAGATGGATGTGCCAAAC | AGCACCTTGGAAGCCCTACAGA |
| Mouse-IL-6 | CCACTTCACAAGTCGGAGGCTTA | TGCAAGTGCATCATCGTTGTTC |
| Mouse-ARG-1 | ACATTGGCTTGCGAGACGTA | ATCACCTTGCCAATCCCCAG |
| Mouse-CD11b | CCACACTAGCATCAAGGGCA | GCTTCACACTGCCACCGT |
| Human-GAPDH | GAAAGCCTGCCGGTGACTAA | GCCCAATACGACCAAATCAGAGA |
| Human-VEGF | CTTGCCTTGCTGCTCTACCT | AGCTGCGCTGATAGACATCC |
| Human-KDR | GGAAGGTTGCTTGCTCTCAC | CAGGGCAGACAAGTGGGTAT |
| Human-FLT1 | TCACCACGGACCTCAATACA | CGATGCTTCACGCTGATAAA |
| Rat-GAPDH | TCAACAGGGATGCTTACCCC | CCGATACGGCCAAATCCGTTC |
| Rat-Runx-2 | GACCAACCGAGTCATTTAAGGC | AAGAGGCTGTTTGACGCCAT |
| Rat-OPN | TCACTGCCAGCACACAAG | GCATCGGGATACTGTTCA |
| Rat-BMP-2 | CTGCGGTCTCCTAAAGGTCG | ACTCAAACTCGCTGAGGACG |
| Rat-Col-1 | CACTCAGCCCTCTGTGCCTC | AACCTTCGCTTCCATACTCG |
| Mouse-Tnf | CCCTCACACTCACAAACCAC | ACAAGGTACAACCCATCGGC |
| Mouse-CD40 | TTGTTGACAGCGGTCCATCT | TCTCAAGAGCTGTGCAGTGG |
| Mouse-Birc3 | AAGAGCCAAGAGCCTTCAAGT | TGCTAGGCTGATACCCTTGG |
| Mouse-Tnfsf13b | TTGTACCAGTTGGCTGCCTT | GCCGGTGTCAGGAGTTTGA |
| Mouse-Lta | GCCTTTCCTGCCTTCGACTG | GTCATGTGGAGAACCTGCTGTG |
| Mouse-Ltb  Mouse-Map3k14 | GATCAGGGACGTCGGGTTGAG  CCCGCTTTGTCTCAAGATTGC | CTGAGAGGCTAGAGGGTGAGG  CTCCCACTTCCTGTAGTGCC |
| Mouse-Tnfsf14 | TCCTGAGACTGCATCAACGTC | TGGCGTTGGCTCCTGTAAGA |
| Mouse-Tnfrsf11a | CTTGCACGGCTGGCTACC | CCTTGTTGAGCTGCAAGGGATG |
| Mouse-Bcl2 | CACCCCTGGTGGACAACATC | ATAGTTCCACAAAGGCATCCCAG |
|  |  |  |
